# Supplementary material
Source: publisher figshare collection journal article supplement (https://tandf.figshare.com/ndownloader/files/21783465)
Supplement: Supplementary file 1 [file 21783465]

Supplementary Table 1. Summary of analysis of variance (ANOVA) and Tukey’s HSD test for mean values of anther dehiscence characters as affected by panicle position and inclination in Experiment 1.

|  | Apical Dehiscence Length (µm) | Basal Dehiscence Length (µm) |
| --- | --- | --- |
| Trial (T) |  |  |
| 1 | 561.3 a | 294.8 a |
| 2 | 548.6 ab | 285.0 a |
| 3 | 540.6 b | 293.5 a |
| Position (P) |  |  |
| Above | 549.2 a | 290.4 a |
| Canopy | 551.1 a | 291.8 a |
| Inclination (I) |  |  |
| Inclined | 543.7 a | 292.5 a |
| Upright | 556.6 a | 289.7 a |
| P×I |  |  |
| Above Inclined | 544.7 a | 294.2 a |
| Above Upright | 553.7 a | 286.6 a |
| Canopy Inclined | 542.7 a | 290.8 a |
| Canopy Upright | 559.6 a | 292.8 a |
| ANOVA |  |  |
| Trial (T) | * | n.s |
| Position (P) | n.s | n.s |
| Inclination (I) | n.s | n.s |
| P×I | n.s | n.s |
| T×P | n.s | n.s |
| T×I | n.s | n.s |
| T×P×I | n.s | ** |

Above: Panicles in pots were set 25 cm above the canopy surface. Canopy: Panicles in pots were set at the height of canopy surface. Inclined: Pots were inclined at 30° from the vertical. Upright: Pots were set upright. Means followed by the same letter in each column are not significantly different in Tukey’s HSD tests (*P* < 0.05). **: *p* < 0.01; *: *p* < 0.05; n.s.: not significant.

Supplementary Table 2. Summary of analysis of variance (ANOVA) and Tukey’s HSD test for mean values of anther dehiscence characters as affected by panicle position and inclination in Experiment 2.

|  | Apical Dehiscence Length (µm) | Basal Dehiscence Length (µm) |
| --- | --- | --- |
| Trial (T) |  |  |
| 1 | 494.2 | 248.2 |
| 2 | 505.6 | 248.5 |
| 3 | 517.8 | 221.7 |
| Position (P) |  |  |
| Canopy | 511.2 | 235.4 |
| Under | 500.5 | 243.6 |
| Inclination (I) |  |  |
| Inclined | 509.2 | 237.9 |
| Upright | 502.6 | 241.1 |
| P×I |  |  |
| Canopy Inclined | 518.3 | 232.1 |
| Canopy Upright | 504.2 | 238.6 |
| Under Inclined | 500.0 | 243.6 |
| Under Upright | 501.0 | 243.5 |
| ANOVA |  |  |
| Trial (T) | n.s | n.s |
| Position (P) | n.s | n.s |
| Inclination (I) | n.s | n.s |
| P×I | * | n.s |
| T×P | n.s | n.s |
| T×I | n.s | n.s |
| T×P×I | n.s | n.s |

Canopy: Panicles in pots were set at the height of canopy surface. Under: Panicles in pots were set beneath the height of panicles in the canopy. Inclined: Pots were inclined at 30° from the vertical. Upright: Pots were set upright. *: *p* < 0.05; n.s.: not significant.
